# Supplementary material for: Effect of Model Body Type and Print Angle on the Accuracy of 3D-Printed Orthodontic Models
Source: Preprints.org preprint supplement (doi:10.20944/preprints202403.0335.v1), 2024-03-06
Supplement: Supplementary file 1 [file supplementary]

Table S1: Mean measurements of experimental models in mm (N=10 models per model type and print angle). Mean measurements were calculated from 30 measurements (three measurements per site on each of the 10 models per model type and print angle).

| **Model type** | **Solid** | | | **Shell** | | |
| --- | --- | --- | --- | --- | --- | --- |
| **Print angle** | **0°** | **70°** | **90°** | **0°** | **70°** | **90°** |
| Incisor Height | -0.20 ± 0.03 | -0.09 ± 0.04 | -0.08 ± 0.06 | -0.23 ± 0.03 | -0.10 ± 0.04 | -0.08 ± 0.06 |
| Canine Height | -0.25 ± 0.03 | -0.14 ± 0.05 | -0.14 ± 0.04 | -0.26 ± 0.03* | -0.19 ± 0.03 | -0.14 ± 0.04 |
| Premolar Height | -0.20 ± 0.02 | -0.12 ± 0.03 | -0.14 ± 0.04 | -0.21 ± 0.03 | -0.14 ± 0.06 | -0.12 ± 0.04 |
| Molar Height | -0.19 ± 0.02 | -0.01 ± 0.04 | -0.12 ± 0.05 | -0.19 ± 0.05 | -0.13 ± 0.05 | -0.10 ± 0.02 |
| Incisor Width | -0.04 ± 0.05 | -0.01 ± 0.04 | -0.03 ± 0.06 | -0.03 ± 0.05 | -.02 ± 0.05 | -0.09 ± 0.07 |
| Canine Width | 0.04 ± 0.05 | 0.01 ± 0.04 | -0.02 ± 0.03 | 0.04 ± 0.04 | 0.01 ± 0.03 | -0.05 ± 0.03 |
| Premolar Width | -0.02 ± 0.03 | -0.02 ± 0.04 | -0.02 ± 0.03 | -0.03 ± 0.04 | -0.04 ± 0.03 | -0.02 ± 0.03 |
| Molar Width | 0.02 ± 0.04 | 0.01 ± 0.03 | 0.03 ± 0.01 | 0.01 ± 0.05 | -0.02 ± 0.02 | -0.01 ± 0.02 |
| Intermolar Distance | -0.15 ± 0.25 | 0.10 ± 0.23 | 0.13 ± 0.25 | 0.09 ± 0.27 | 0.37 ± 0.17 | 0.12 ± 0.30 |
| Intercanine Distance | -0.04 ± 0.20 | -0.07 ± 0.19 | -0.07 ± 0.22 | 0.01 ± 0.24 | 0.07 ± 0.13 | -0.21 ± 0.25 |
| Arch Depth | -0.18 ± 0.08 | -0.15 ± 0.05 | -0.17 ± 0.06 | -0.22 ± 0.12 | -0.21 ± 0.06 | -0.26 ± 0.04 |

* Only one mean measurement fell outside the selected range of clinical acceptability
